# Supplementary material for: Manipulation of Insect Vectors’ Host Selection Behavior by Barley Yellow Dwarf Virus Is Dependent on the Host Plant Species and Viral Co-Infection
Source: MDPI journal article supplement (doi:10.3390/life12050644), 2022-04-26
Supplement: s1 [file s1]

# Supplementary Materials

**Supplementary Table S1.** Primers used for RT-qPCR analysis.

| Name              | Sequence (5'-3')     | Target                     | Reference                       |
|-------------------|----------------------|----------------------------|---------------------------------|
| BdUbi4_F          | TGACACCATCGACAACGTGA | <i>Bradi3g04730 (Ubi4)</i> | [Chambers <i>et al.</i> , 2012] |
| BdUbi4_R          | GAGGGTGGACTCCTTCTGGA | <i>Bradi3g04730 (Ubi4)</i> | [Chambers <i>et al.</i> , 2012] |
| qBYDV-PAV-RdRp_F  | GAATGGTCAGAAGGCCCGAT | BYDV-PAV, RdRp             | This study                      |
| qBYDV-PAV-RdRp_Rv | GTTGAGCACCAGACCACACT | BYDV-PAV, RdRp             | This study                      |
| qCYDV-RPS-RdRp_F  | AACTGGGAATCAGCGTTCGG | CYDV-RPS, RdRp             | This study                      |
| qCYDV-RPS-RdRp_Rv | GCGCCAATCTTCATCCTCCA | CYDV-RPS, RdRp             | This study                      |

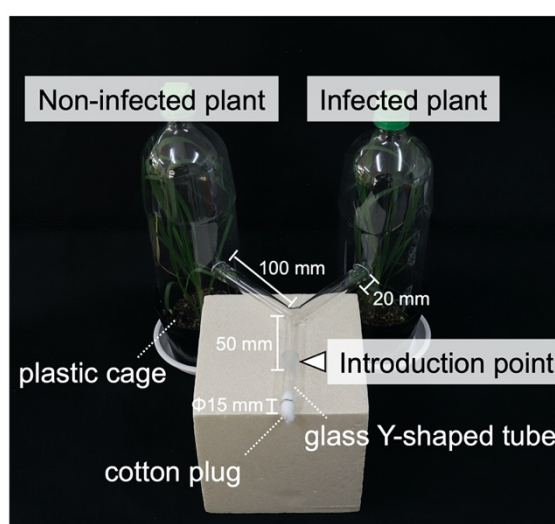

**Supplementary Figure S1.** The experimental setup of the dual-choice test Arena Y.

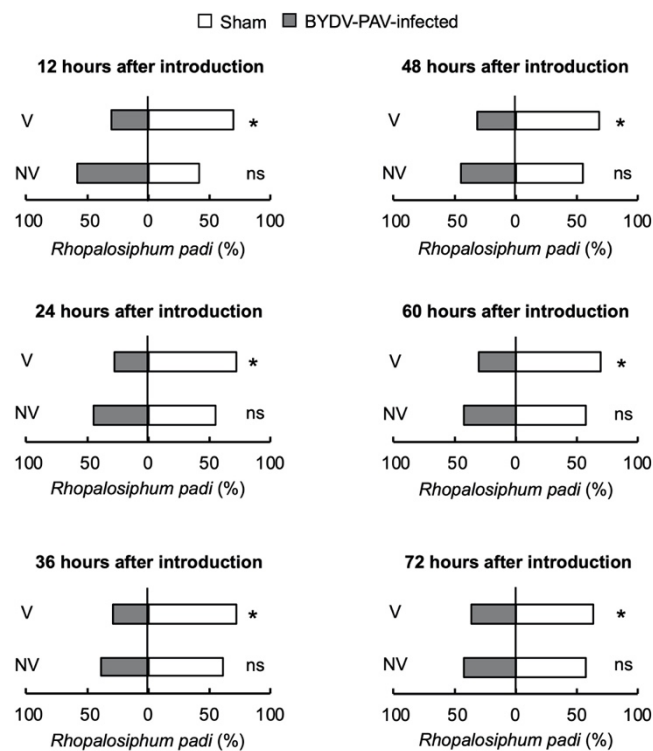

**Supplementary Figure S2.** The preference of viruliferous aphids *Rhopalosiphum padi* harboring BYDV-PAV for non-infected wheat plants is maintained throughout the 72-hour test. Mean proportion of nonviruliferous (NV) and viruliferous (V) apterous aphids responding to wheat over 12 to 72 hours after introduction into a dual-choice Arena TT. The graphs represent the percentage of vector aphid *R. padi* adults and nymphs found on each test plant within a single-choice cage. Sham-inoculated wheat plants were tested in comparison with BYDV-PAV-infected plants at 14 dpi. The asterisk indicates a significant preference within a dual-choice test: *ns*, not significant; asterisk,  $p < 0.05$  (binomial test).

## 20 minutes after introduction; Arena Y

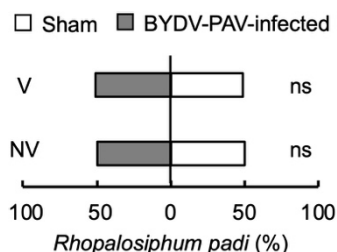

**Supplementary Figure S3.** Viruliferous and nonviruliferous aphids exhibit no preference between virus-infected and non-infected wheat plants after 20 minutes. Mean proportion of viruliferous (V) and nonviruliferous (NV) aphids responding to wheat in a dual-choice Arena Y 20 minutes after introduction. The graphs represent the percentage of vector aphid *R. padi* adults and nymphs found on each test plant within a single-choice cage. Sham-inoculated wheat plants were tested in comparison with BYDV-PAV-infected plants at 14 dpi. The asterisk indicates a significant preference within a dual-choice test: *ns*, not significant; asterisk,  $p < 0.05$  (binomial test).

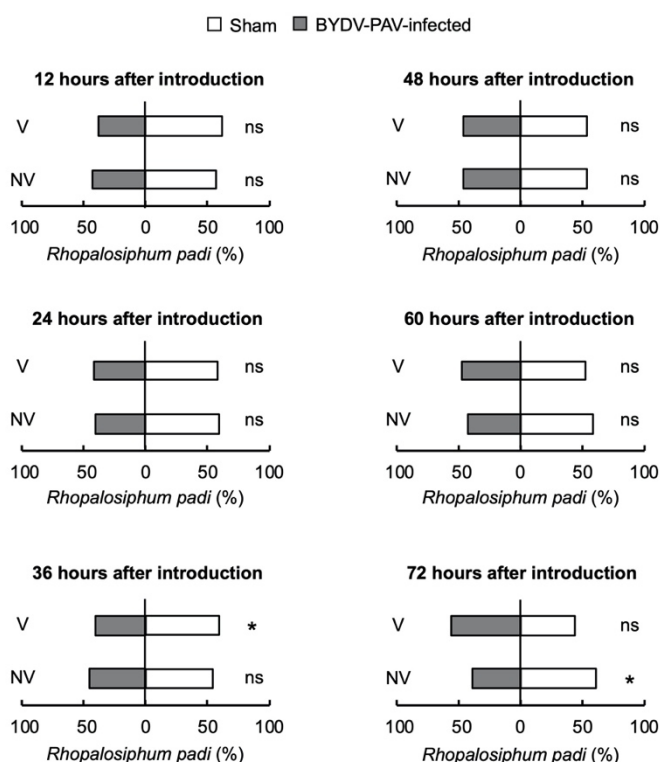

**Supplementary Figure S4.** Viruliferous aphids harboring BYDV-PAV do not exhibit a stable preference for non-infected *Brachypodium distachyon* plants throughout the 72-hour test. Mean proportion of nonviruliferous (NV) and viruliferous (V) apterous aphids responding to *Brachypodium* plants over 12 to 72 hours after introduction into a dual-choice Arena TT. The graphs represent the percentage of vector aphid *R. padi* adults and nymphs found on each test plant within a single-choice cage. Sham-inoculated *B. distachyon* plants were tested in comparison with BYDV-PAV-infected plants at 14 dpi. The asterisk indicates a significant preference within a dual-choice test: *ns*, not significant; asterisk,  $p < 0.05$  (binomial test).
